# Supplementary material for: Changes in Denitrification Potentials and Riverbank Soil Bacterial Structures along Shibetsu River, Japan
Source: Hindawi journal article supplement (doi:10.1155/2018/2530946), 2018-06-26
Supplement: f1 [file 2530946.f1.docx]

Table S1. The locations (latitudes and longitudes) of the sampling sites and their basic soil characteristics

| Site name | Latitude | Longitude |
| --- | --- | --- |
| A | 43°33.642'N | 144°42.904'E |
| B | 43°36.588'N | 144°47.043'E |
| C | 43°32.538'N | 144°45.496'E |
| D | 43°31.199'N | 144°47.195'E |
| E | 43°30.440'N | 144°48.954'E |
| F | 43°31.811'N | 144°54.767'E |
| G | 43°35.936'N | 145°01.988'E |
| H | 43°38.285'N | 145°04.825'E |

Table S2. Characteristics of the sampled soils for each sampling depth. We could not obtain the 15‒30 cm samples for the site B, E and F because the soil was shallow and rocks were present at the depth >15 cm. The values were shown as averages ± standard deviations (*n* = 3).


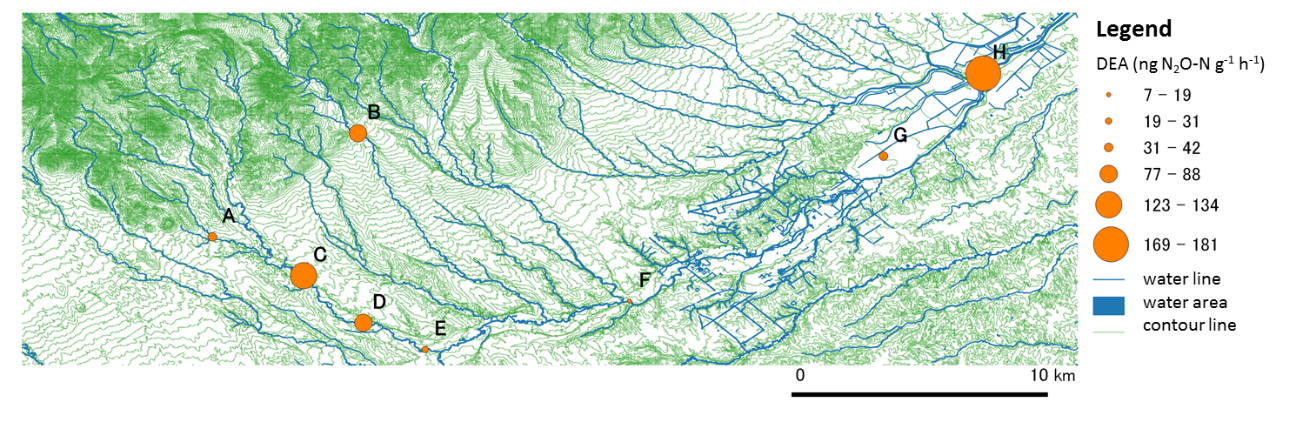


Figure S1. Sampling sites of the riverbank soils. The size of the circles corresponds the magnitude of denitrification potential with excess carbon and nitrate, under an anaerobic conditions. The data of water lines, water areas and contour lines by Geospatial Information Authority of Japan (2016) were used for the base map.


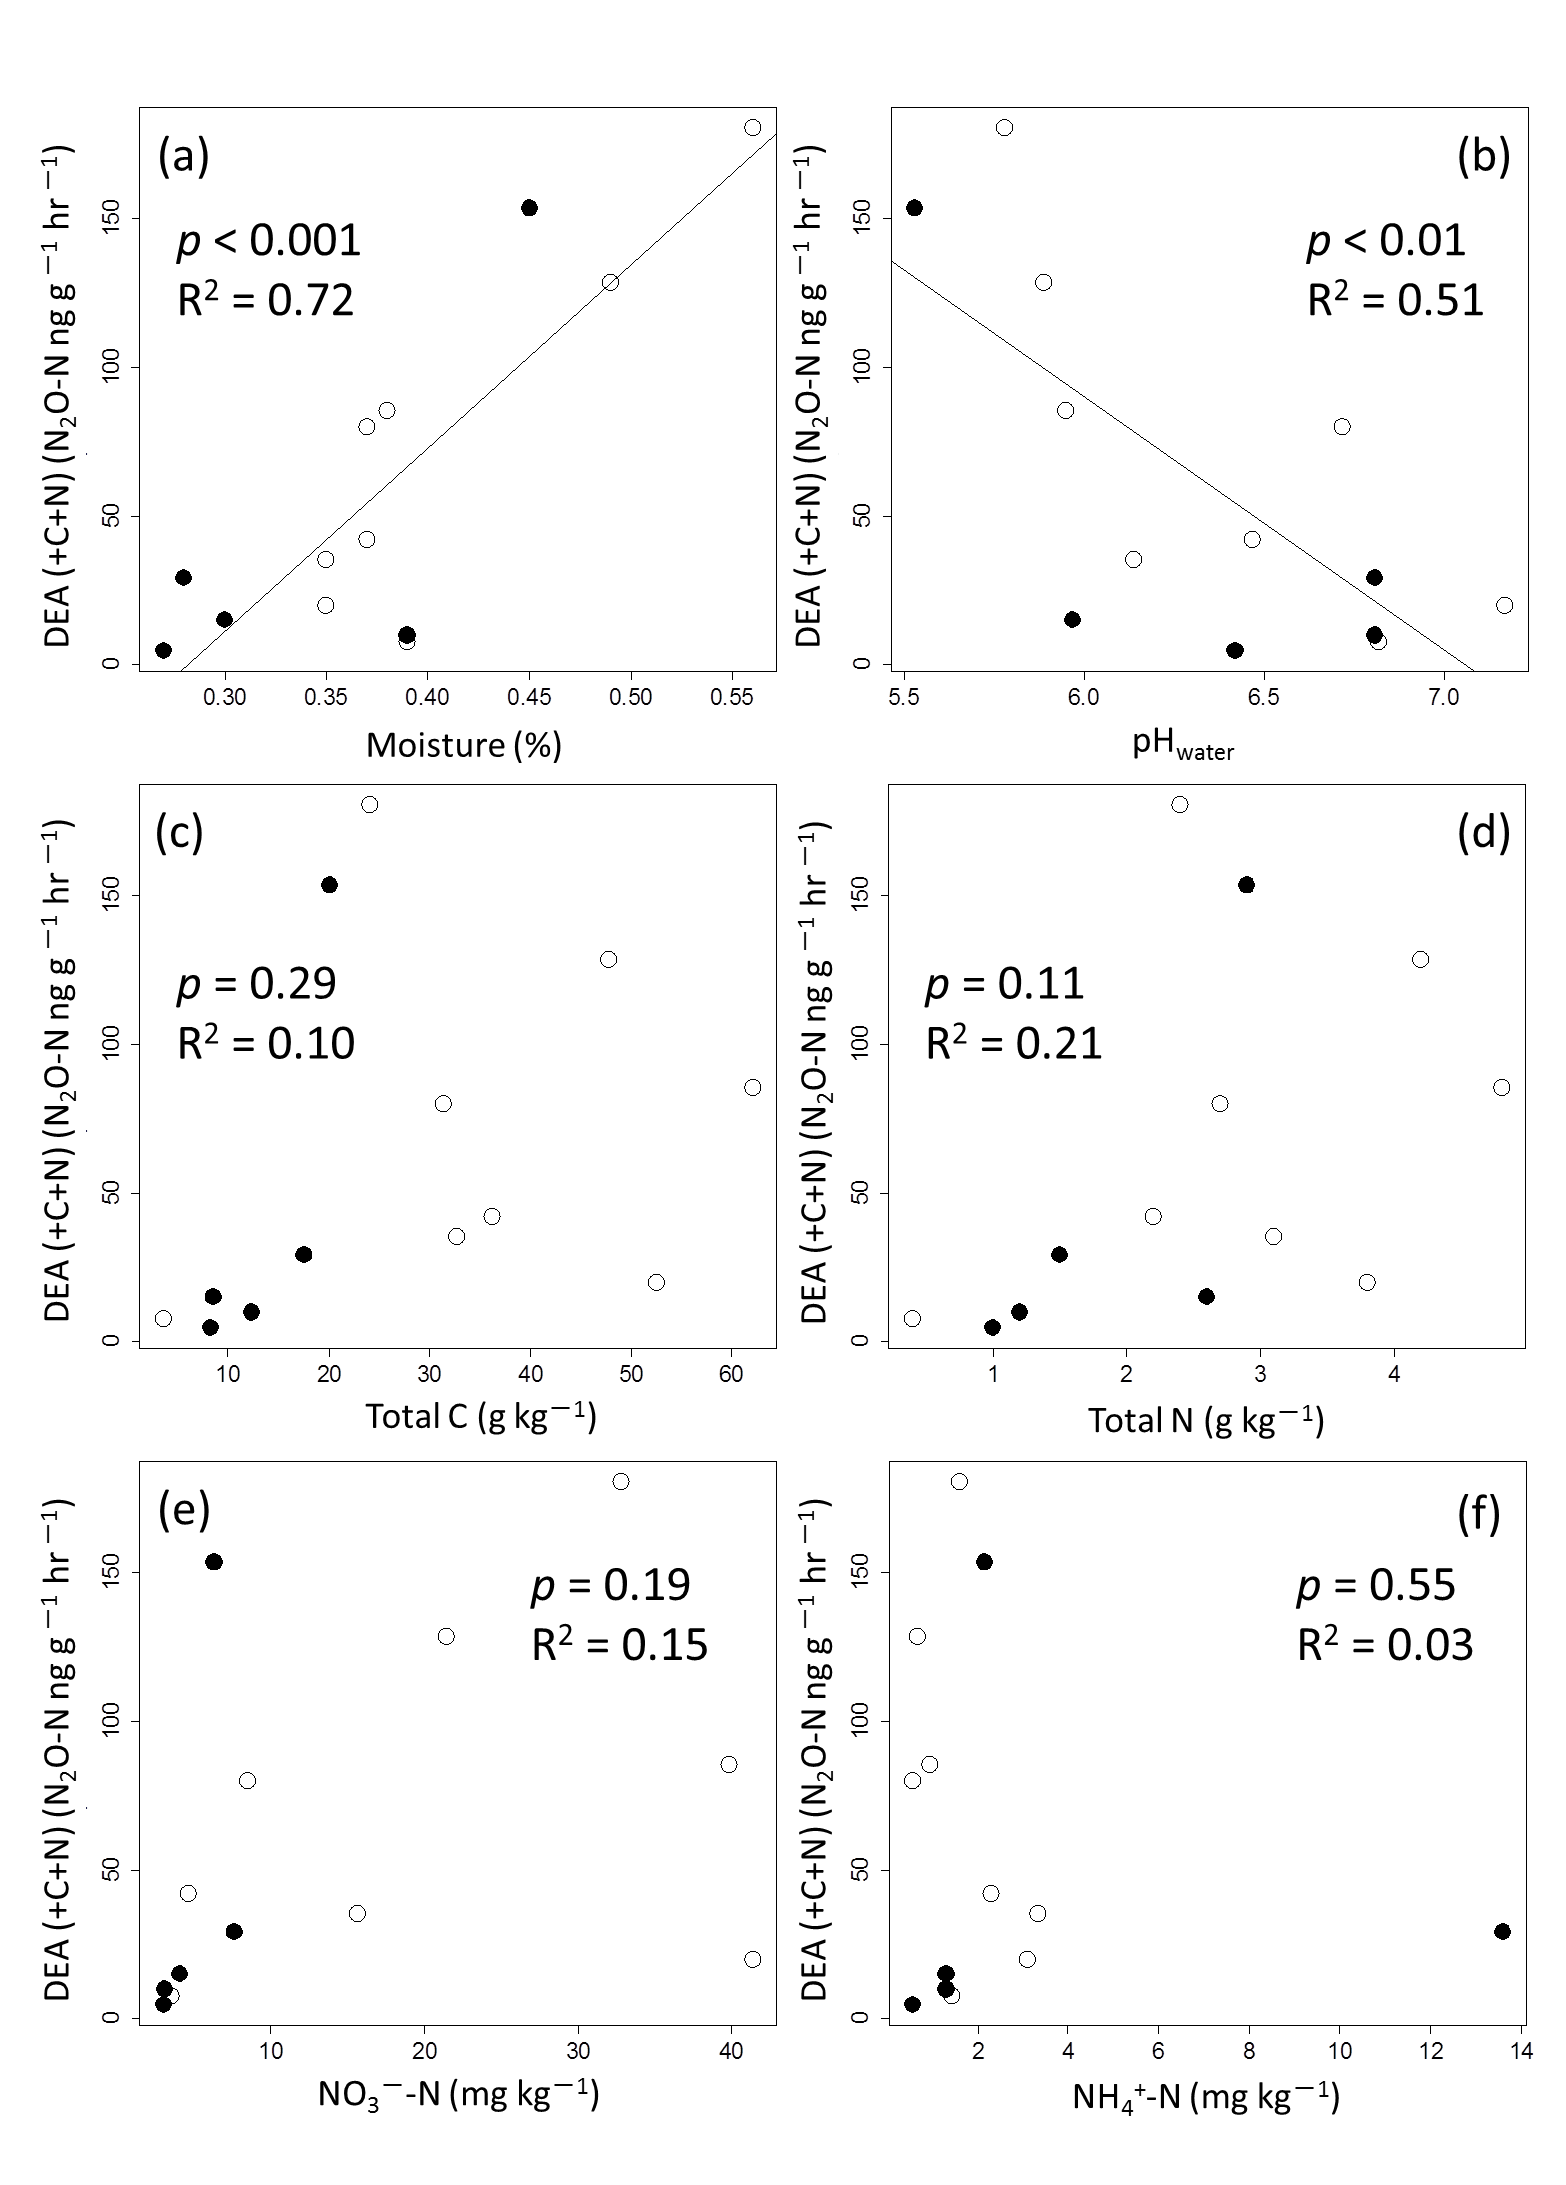


Figure S2. The relationships between denitrification potentials with added C and N (DEA) and other soil characteristics, namely (a) soil moisture at sampling, (b) pHwater, (c) total C, (d) total N, (e) nitrate-N contents and (f) ammonium-N contents. Significant linear relationships were observed for the moisture and pHwater. The open circles were the top soils (0–15 cm) and the filled circles were subsoils (15–30 cm).


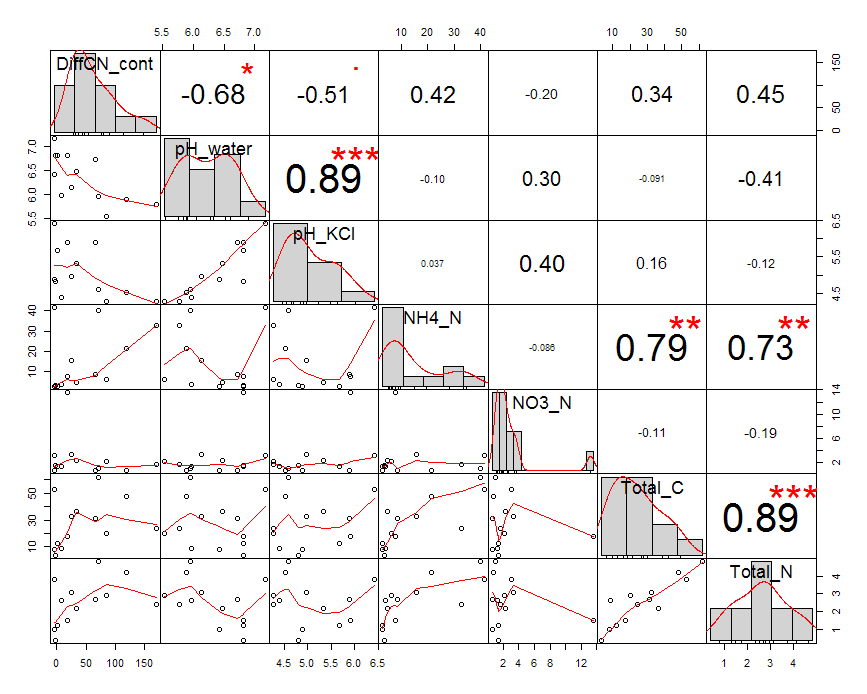


Figure S3. Correlation plots among the increase in the denitrification potentials after the addition of carbon and nitrogen substrates (DiffCN_cont, ng N g−1 hr−1) and environmental parameters. The NH4+-N and NO3−-N values were expressed in mg N g−1 soil. The total C and N values were expressed in g kg soil−1. The histogram, kernel density overlays, absolute correlations, and significance asterisks (*, ** and *** for <0.05, <0.01 and <0.001, respectively) were shown on the figure.

Figure S4. Changes in relative abundance of bacteria phylum, based on 16S rRNA analysis. The capitals A to H define the sampling sites. The words “before” and “with CN” mean the data before and after the addition of C and N substrates, respectively.

Figure S5. Changes in relative abundance of classes within the phylum Proteobacteria, based on 16S rRNA analysis. The capitals A to H define the sampling sites. The words “before” and “with CN” mean the data before and after the addition of C and N substrates, respectively.

Figure S6. Changes in relative abundance of orders within the class Gammaproteobacteria, based on 16S rRNA analysis. The capitals A to H define the sampling sites. The words “before” and “with CN” mean the data before and after the addition of C and N substrates, respectively.


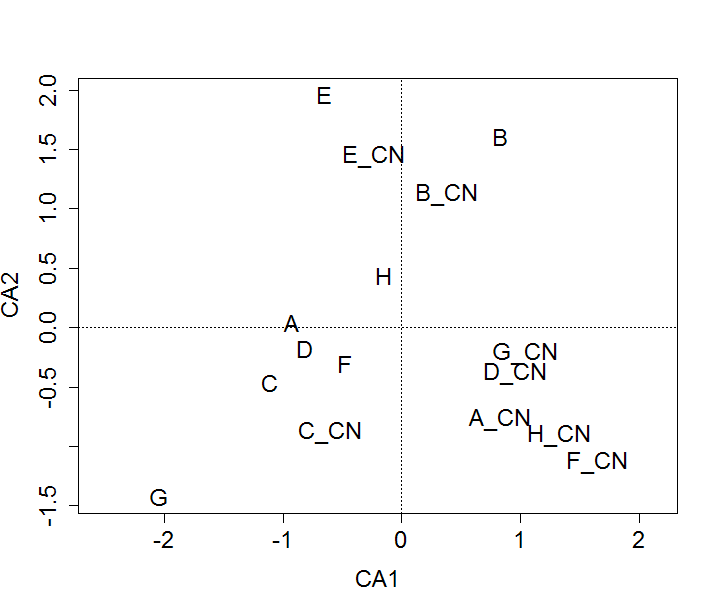


Figure S7. The results from the canonical correlation analysis of the 16S rRNA community data, before and after the addition of C and N substrates. The alphabets A to H suggests the sampling sites and the alphabets with or without “_CN” are the samples after or before the addition of C and N substrates, respectively.
